1 Running title: Developmental and genetic stress responses

2

3 **Oxidative stress delays development and alters gene function in the agricultural pest**

4 **moth, *Helicoverpa armigera***

5 Nonthakorn (Beatrice) Apirajkamol<sup>1,2</sup>, Bill James<sup>2</sup>, Tom K Walsh<sup>2,3</sup>, Angela McGaughran<sup>1,2</sup>

8 <sup>1</sup>Division of Ecology and Evolution, Australian National University, Canberra, ACT,

9 Australia.

10 <sup>2</sup>Black Mountain Laboratories, Commonwealth Scientific and Industrial Research

11 Organisation, Canberra, ACT, Australia.

12 <sup>3</sup>Adjunct Fellow, MacQuarie University, Sydney, NSW, Australia

13

14

15 Correspondence: Dr. Angela McGaughran

16 [ang.mcgauhran@gmail.com](mailto:ang.mcgauhran@gmail.com)

17 **Abstract**

18 Stress is a widespread phenomenon that all organisms must endure. Common in nature is  
19 oxidative stress, which can interrupt cell homeostasis to cause cell damage and may be  
20 derived from respiration or from environmental exposure through diet. As a result of the  
21 routine exposure from respiration, many organisms can mitigate the effects of oxidative  
22 stress, but less is known about responses to oxidative stress from other sources. *Helicoverpa*  
23 *armigera* is a major agricultural pest moth that causes significant damage to crops worldwide.  
24 Here, we examined the effects of oxidative stress on *H. armigera* by chronically exposing  
25 individuals to paraquat - a free radical producer - and measuring changes in development  
26 (weight, developmental rate, lifespan), and gene expression.

27 We found that oxidative stress strongly affected development in *H. armigera*, with  
28 stressed samples spending more time as caterpillars than control samples (>24 vs. ~15 days,  
29 respectively) and living longer overall. We found 1,618 up- and 761 down-regulated genes,  
30 respectively, in stressed vs. control samples. In the up-regulated gene set were genes  
31 associated with cell senescence and apoptosis and an over-representation of biological  
32 processes related to cuticle and chitin development, glycine metabolism, and oxidation-  
33 reduction.

34 Oxidative stress clearly impacts physiology and biochemistry in *H. armigera* and the  
35 interesting finding of an extended lifespan in stressed individuals could demonstrate hormesis,  
36 the process whereby toxic compounds can actually be beneficial at low doses. Collectively,  
37 our findings provide new insights into genomic responses to oxidative stress in invertebrates.

38

39 **Key words:** chronic, development, hormesis, invertebrate, oxidative stress, RNASeq

## 40 **Introduction**

41 Stress is encountered by all living beings with its various manifestations producing different  
42 responses, from small-scale molecular changes to large-scale shifts in development and  
43 lifespan. In a variety of species, stress has been shown to strongly affect fitness, resulting in  
44 changes in organismal behaviour, developmental rate, physiology, and mortality (Adamo,  
45 2012; Trakimas et al., 2019). For example, McCormick et al. (1998) reported that physical  
46 stress (chasing, crowding, and draining) in Atlantic salmon resulted in lower growth rates and  
47 body weight. In addition, stress has been shown to shorten lifespan in some species (e.g.,  
48 humans, Shalev et al., 2013; cane toads, Jessop et al., 2013), but to extend lifespan in others  
49 (e.g., *Drosophila melanogaster*, Hercus et al., 2003; Jessop et al., 2013; *Caenorhabditis*  
50 *elegans*, Lithgow & Walker, 2002). As well as impacting development, stressful  
51 environments can alter cell-signalling pathways, resulting in changes in gene expression,  
52 metabolism, cell cycles, protein homeostasis, and enzyme activity (Rampon et al., 2000;  
53 Richter et al., 2010; Weake & Workman, 2010; Nadal et al., 2011).

54 An important component of the overall stress response is oxidative stress, which is a  
55 toxic by-product of aerobic metabolism (Lushchak, 2014). Oxidative stress occurs when  
56 oxygen becomes excited and hyperactive i.e., reactive oxygen species - ROS (Kregel &  
57 Zhang, 2007), reacting with other molecules (Halliwell & Gutteridge, 1984; Imlay, 2003) to  
58 increase free radical (e.g., hydroxyl radicals, superoxide anions, and hydrogen peroxide)  
59 production (Finkel & Holbrook, 2000). As a consequence, the balance between antioxidant  
60 production and ROS removal can be disrupted, ultimately causing damage to cellular  
61 components such as DNA, enzymes, and cell membranes (Betteridge, 2000; Mittler, 2002;  
62 Blumberg, 2004). The majority of aerobic organisms have developed sophisticated methods to  
63 relieve the effects of oxidative stress (Krishnan et al., 2007), however, little is known about  
64 this process in pests.

65           *Helicoverpa armigera* (Lepidoptera: Noctuidae), is a major agricultural pest moth. Its'  
66 larvae cause damage by consuming the reproductive parts of plants and *H. armigera* can feed  
67 on >300 different host species, collectively causing the agricultural industry losses of ~\$USD  
68 5 billion annually (Pearce et al., 2017). *H. armigera* has a wide environmental tolerance  
69 range, a high fecundity, and is able to migrate over very large (>1000 km) distances (Feng et  
70 al., 2004). These factors together enable *H. armigera* to occupy a worldwide distribution  
71 encompassing Asia, Australia, Africa, Europe, and more recently, parts of South America  
72 (Czepak et al., 2013; Kriticos et al., 2015).

73           General information about stress responses in *H. armigera* is scarce. However, various  
74 measures of development have been shown to respond to stress in this species. For example,  
75 both weight and developmental rate are associated with the type of host plant on which  
76 individuals are raised. In particular, caterpillars reared on less favourable host plants (e.g.  
77 *Arabidopsis*, tobacco, and tomato) take longer to reach certain developmental stages and also  
78 have a lower body weight (Pearce et al., 2017). Yet, in other research, different types of stress  
79 have been shown to affect *H. armigera* differently. For example, higher temperatures and  
80 increased predator stress have been shown to hasten development (Xiong et al., 2015; Noor-  
81 Ul-Ane et al., 2018), whereas low temperatures, and poor diet apparently elongate  
82 developmental periods in *H. armigera* (Xiong et al., 2015; Pearce et al., 2017; Noor-Ul-Ane  
83 et al., 2018). With respect to oxidative stress, acute exposure has been shown to extend  
84 lifespan in *H. armigera* (Zhang et al., 2017) and, when exposed to ultraviolet (UV) radiation  
85 (a common environmental stress that increases levels of oxidation), *H. armigera* shows up-  
86 regulation of antioxidant genes, but only at certain UV doses (Wang et al., 2012).

87           Only few studies have targeted the effects of oxidative stress on *H. armigera* and none  
88 have looked at chronic exposure. This is unfortunate because oxidative stress is often  
89 associated with acute exposure to pesticides (Abdollahi et al., 2004), and is faced chronically

90 by *H. armigera* in the wild via natural plant defence mechanisms (many plant species are able  
91 to intensify levels of oxidative stress to defend themselves against herbivore and virus attacks;  
92 e.g. Aucoin et al., 1991). In this study, we examine the effects of oxidative stress on *H.*  
93 *armigera* using the oxidative producer, paraquat.

94       Paraquat (*N,N'*-dimethyl-4,4'-bipyridinium dichloride) is an organic herbicide that  
95 kills a wide range of pests by generating superoxide anions (Shadnia et al., 2018). Despite  
96 being banned in several countries, paraquat is widely available throughout the world due to its  
97 efficiency and low cost (Kim et al., 2017), and there is evidence that it has a strong impact on  
98 development and gene expression in some insects. For example, in *D. melanogaster*, paraquat  
99 has been shown to increase mortality, reduce climbing ability, and result in up-regulation of  
100 several antioxidant genes (Krůček et al., 2015). In *H. armigera*, paraquat injected into pupae  
101 has been shown to extend diapause by affecting the insulin-signalling pathway (Zhang et al.,  
102 2017), but no work to date has focused on stress effects of paraquat in other developmental  
103 stages of *H. armigera*. Thus, we examine development and gene expression in *H. armigera*  
104 following chronic oxidative stress exposure. Our results provide fundamental information  
105 about genomic responses to stress in invertebrates and new insights into how changes in  
106 development may shape population dynamics, ecosystem consequences, and evolutionary  
107 adaptation in this species.

108

## 109 **Methods**

### 110 Insect rearing

111 All experiments used a lab colony of *H. armigera conferta*, which is widespread across  
112 Australia and New Zealand (Anderson et al., 2016). The colony was originally established  
113 from cotton fields in the Namoi Valley, northern NSW Australia and has been reared in lab  
114 conditions at the Commonwealth Scientific and Industrial Research Organisation (CSIRO) in

115 Canberra since the mid-1980s.

116 To initiate experiments, a large number of two-day old fertilised eggs were collected  
117 from 40 healthy moths and disinfected by soaking in a 0.002% bleach solution (0.0008  $\text{mV}^{-1}$   
118 of chlorine) for 10 min and then washing with tap water. Eggs were air-dried and placed in a  
119 plastic bag to allow hatching. Subsequently, 1st-instar caterpillars were transferred to 32-well  
120 plates for rearing until pupation under optimum conditions ( $25\pm 1^\circ\text{C}$ ,  $50\pm 10\%$  relative  
121 humidity, and light day:night 14:10 to imitate natural light), with a solid artificial diet (see  
122 below), which was changed every week to prevent stress from insufficient food. Once  
123 pupated, the sex of individuals was determined under the microscope. Two pupae of the same  
124 sex were then placed into individual containers (separated by paper to prevent interaction)  
125 until they died. Moths were fed a honey solution as per normal rearing protocols (see below),  
126 which was checked every two days and refilled if needed.

127 The semi-solid artificial diet was prepared for caterpillar rearing, using an in-house  
128 protocol. First, 130 g of soy flour and 700 mL of filtered water were blended with a stick  
129 blender until combined. The mixture was then heated in the microwave until it boiled (4-5  
130 min). Next, 22 g of agar (GELITA, A-181017), 1.7 g of sorbic acid (Sigma-Aldrich, S1626),  
131 and 700 mL of filtered water were combined and gently mixed with a spatula. This mixture  
132 was also heated in the microwave to boiling (4-5 min). Both mixtures were then separately  
133 stirred and reheated before being combined together by blending with a stick blender.  
134 Additional dry ingredients, including 60 g of wheat germ, 53 g of brewers dry yeast, 3.3 g of  
135 L-ascorbic acid (heat sensitive, so after cooling to  $60^\circ\text{C}$ ; Sigma-Aldrich, A4403), and 3.3 g of  
136 nipagin (Methylparaben, Sigma-Aldrich, 79721), were added to the final mixture, along with  
137 5 mL of vegetable oil. Filtered water was added to bring the total volume to 1600 mL and the  
138 mixture was blended until well-combined. This diet was poured into 32-well plates  
139 (approximately 5 mL per well) and left at room temperature for at least an hour to dry, cool

140 down, and set. In all cases, the diet was immediately used or stored at 4°C for a maximum of  
141 two days.

142 After emerging, *H. armigera* moths were fed on a honey solution. To prepare the  
143 honey solution, 40 g of white sugar, 40 g of honey, and 1 g of sorbic acid were weighed into a  
144 1 L bottle. Around 300-400 mL of filtered water was added, then the mixture was heated in  
145 the microwave for 2 min on high heat and shaken to dissolve the sugar. Filtered water was  
146 added to bring the final volume to 1 L; the mixture was then shaken and, with a loosened lid,  
147 placed in an autoclave for 15 min at 121°C to sterilise. After cooling to 60°C, 2 g of ascorbic  
148 acid was added to the mix, which was then shaken and stored at 4°C.

#### 149 Experimental design

150 To determine the optimal ‘stress’ conditions to expose *H. armigera* to, a range-finding  
151 experiment was performed, where individuals were exposed to a number of different  
152 concentrations of paraquat (Sigma-Aldrich 36541) through their diet (i.e., added into the solid  
153 artificial diet before it set or directly into the honey solution). A response was observed  
154 (reduction in weight and body size) in samples exposed to >0.25 mM of paraquat, while  
155 individuals exposed to 0.5 mM had an overall mortality exceeding 50%. Therefore, a final  
156 selection of paraquat concentrations 0.3 mM and 0.4 mM was made to create moderately  
157 stressful conditions (i.e. based on weight/mortality/developmental rate). Individuals were split  
158 into three groups, corresponding to control (normal diet as outlined above), and stressed (0.3  
159 mM or 0.4 mM paraquat) and examined for developmental phenotypes and gene expression.

#### 160 Developmental phenotypes

161 In each treatment group and control, individuals were randomly selected for assessment of  
162 weight (n = 10), developmental stage (n = 32), and mortality (n = 32). Each of these  
163 phenotypes was recorded for the same individuals every two days across three replications  
164 (e.g., total n = 96 for developmental stage and mortality) until all samples had died. In

165 addition, the amount of time spent in each developmental stage (caterpillar, pupa, and moth),  
166 and the overall lifespan (time from hatching to death) was recorded for 40 males and 40  
167 females for each treatment group and control.

#### 168 Statistical analysis

169 Developmental measures were statistically analysed via SPSS ver. 22 (IBM Corp, 2013) to  
170 determine whether there were any differences between control and stressed groups. Mean and  
171 standard deviations (SD) were calculated for all measures and outliers (individuals with  
172 values greater/lesser than mean  $\mp$  2 SD) were removed. One-way ANOVA with Tukey's  
173 HSD (Honestly Significant Difference) was used to assess differences between groups at a  
174 95% confidence interval. The Tukey HSD tests were used in order to reduce false positives  
175 from family-wise error rates (due to the number of treatments), and type II errors from a large  
176 number of standard deviations (Kaufmann & Schering, 2014). In this analysis, samples that  
177 are statistically similar (in terms of mean and variance for the trait being measured) group  
178 together into homogeneous subsets. Thus, if samples are categorised into different groups  
179 (referred to as 'a', 'b', 'c', etc.; see Results), they are considered significantly different from  
180 each other. Data visualisations were performed using the ggplot2 ver. 3.2.1 (Wickham, 2016)  
181 package in R ver. 3.6.1 (R Core Team, 2019).

#### 182 Gene expression analysis

##### 183 *Sample collection and RNA isolation*

184 A total of 72 samples were used for gene expression analysis, corresponding to three groups  
185 (controls, 0.3 mM and 0.4 mM paraquat), with four replicates per group, and each replicate  
186 consisting of a pool of six individuals. Care was taken to select samples of similar body size  
187 for each pool. Each sample was collected at 4th-instar, snap frozen with liquid nitrogen, and  
188 stored at -80°C. Whole caterpillars were then homogenised in TissueLyser II solution  
189 (Qiagen), with 12 × 2 mm ceria-stabilised zirconium oxide ceramic beads (ZROB20-RNA,



190 Next Advance) in 500  $\mu$ l of 90% ethanol at 30  $ls^{-1}$  for 3 min – where the beads, ethanol and  
191 TissueLyser sample racks were pre-chilled to  $-80^{\circ}C$ . Samples were then re-chilled on dry ice  
192 for 1 min and the homogenisation process repeated twice. Subsequently, 20-120  $\mu$ l of  
193 combined homogenates from six individuals (totalling 10 mg of tissue per individual) were  
194 aliquoted into a pool and thoroughly mixed. Into each pool, 1200  $\mu$ l of Lysis Buffer  
195 (PureLink™ RNA Mini Kit) was added, along with 70% ethanol to bring the total to 1600  $\mu$ l  
196 (achieving a final concentration of 40% ethanol, 50% lysis buffer, and 10% tissues). RNA  
197 isolation was conducted following the PureLink™ RNA Mini Kit protocol. The RNA pellet  
198 was re-suspended with 70  $\mu$ l RNase free water and quantity/quality checked by Nanodrop  
199 (ThermoFisher) and MultiNA (Shimadzu).

#### 200 *RNA library preparation and sequencing*

201 Library preparation was conducted using an in-house method adapted from Langevin et al.  
202 (2013). mRNA enrichment was first conducted in order to reduce the amount of ribosomal  
203 RNA (rRNA) in the total RNA sample. Because there are no kits available specifically for  
204 rRNA depletion in *H. armigera*, oligo d(T) capture methods were used to enrich the  
205 concentration of poly-adenylated mRNA. Magnetic beads were prepared by first removing the  
206 liquid residue from beads by placing tubes on a magnet to discharge the supernatant.  
207 Subsequently, beads were washed with 50  $\mu$ l of binding buffer, re-suspended, and the buffer  
208 discharged. Two washes were performed in total. Two rounds of mRNA enrichment were  
209 then performed. In the first round, RNA was denatured by incubating 50  $\mu$ l of the total RNA  
210 at  $65^{\circ}C$  for 2 min then immediately chilling on ice. 15  $\mu$ l of Oligo d(T)25 Magnetic Beads  
211 (S1419S, New England Biolabs), were combined with 50  $\mu$ l of binding buffer (20 mM Tris-  
212 HCl pH 7.5, 1 M LiCl, 2 mM EDTA) and added to 50  $\mu$ l of each denatured RNA sample in a  
213 V-bottom assay plate (P-96-450V-C, ThermoFisher). Samples were incubated at room  
214 temperature for 15 min on a Titramax plate shaker (Heidolph) at 1200 RPM to allow the

215 mRNA to hybridise to the beads. A covered magnetic separator (i.e., a neodymium 50 (N50)  
216 magnet in a 3D printed case) was inserted and the plate incubated for a further 2 min. Beads  
217 were then washed with 120  $\mu$ l of washing buffer (10 mM Tris-HCl pH 7.5, 150 mM LiCl, 2  
218 mM EDTA), with the washing process repeated twice. mRNA was eluted by submerging the  
219 washed magnetic separator with the beads in 50  $\mu$ l of Elution Buffer (10 mM Tris-HCl pH  
220 7.5), then the magnetic separator was removed and the plate was incubated at 80°C for 2 min  
221 to re-suspend the beads and mRNA. Finally, the magnetic separator was then inserted to  
222 capture and remove the beads. For the second round of mRNA enrichment, 50  $\mu$ l of binding  
223 buffer was added to eluted mRNA, then the washed oligo d(T)<sub>25</sub> magnetic beads from round  
224 one (following re-suspension in nuclease-free water at least two times) were transferred into  
225 the wells. Samples were incubated on a Titramax plate shaker at 1200 RPM for 15 min and  
226 the magnetic beads were captured with the separator. The beads were washed by transferring  
227 them with the separator to 20  $\mu$ l of Washing Buffer 2, repeated twice. Subsequently, mRNA  
228 was eluted by transferring the washed beads with separator to a new well with 8  $\mu$ l of Elution  
229 Buffer and the magnetic separator was removed. Samples were finally incubated at 80°C for 2  
230 min, beads were removed by capturing them with the magnetic separator, and the purified  
231 mRNA was stored at -80°C.

232 Fragmentation was conducted in order to ensure the desired insert sizes for Illumina  
233 sequencing, by combining heat and Mg<sup>2+</sup> ions with the mRNA. Fragmented mRNA was then  
234 synthesised to first strand cDNA using a reverse transcription process. 3  $\mu$ l of purified mRNA  
235 was combined with 1  $\mu$ l of 5 $\times$  SMARTscribe RTase buffer (TakaraBio) and 1  $\mu$ l of 1  $\mu$ M RT-  
236 Hex primer and incubated at 85°C for 5 min. Samples were immediately transferred onto ice  
237 for 2 min and then let rest at room temperature for at least 10 min. Finally, 5  $\mu$ l RT master  
238 mix (1  $\mu$ l of 5x SMARTscribe RTase buffer, 1  $\mu$ l of 10 mM dNTPs, 0.5  $\mu$ l of 100 mM DDT,  
239 0.25  $\mu$ l of RiboLock RNase inhibitor, 1  $\mu$ l of 10  $\mu$ M Bio\_TS\_RNA primer, 0.5  $\mu$ l of

240 SMARTscribe RTase, and 0.75  $\mu$ l of nuclease-free water) was added to the fragmented  
241 mRNA and mixed thoroughly. Samples were incubated in a thermal cycler for reverse  
242 transcription and template switching reactions to occur, under the following cycling  
243 conditions: 25°C for 30 min, 42°C for 90 min, 72°C for 10 min, with a heated lid temperature  
244 of 45°C throughout and a starting block temperature of 25°C.

245 First strand cDNA samples were purified using solid phase reversible immobilisation  
246 (SPRI) paramagnetic MagNA magnetic bead (Rohland & Reich, 2012). The completed  
247 reverse transcriptase reactions were transferred to V-bottom assay plates, then 9.5  $\mu$ l of  
248 MagNA beads were added. Samples were thoroughly mixed and incubated at room  
249 temperature for 8 min. The MagNA beads were recaptured by inserting a magnetic separator,  
250 then incubated at room temperature for at least 2 min. The magnetic separator and beads were  
251 then transferred into 200  $\mu$ l of 80% ethanol for washing. Beads were washed twice and then  
252 allowed to air dry for at least 3 min. cDNA was re-suspended by transferring the washed  
253 magnetic separator with the beads into 10  $\mu$ l of nuclease-free water. The separator was then  
254 removed and the sample incubated for 5 min. Beads were again recaptured by inserting the  
255 magnetic separator and then discarding it. Finally, the cDNA MagNA magnetic clean-up  
256 process was repeated in order to ensure complete depletion of short, empty constructs, this  
257 time with a final elution volume of 20  $\mu$ l. Purified cDNA was processed immediately or  
258 stored at -20°C.

259 The optimal cycle number for the barcoding of each individual sample was determined  
260 by qPCR. The purified first strand cDNA was diluted by aliquoting 1  $\mu$ l of cDNA into 15  $\mu$ l  
261 of nuclease-free water. A qPCR reaction was set up in a 10  $\mu$ l reaction volume (5  $\mu$ l of Bio-  
262 Rad SsoFast EvaGreen Supermix, 1  $\mu$ l of 2.5  $\mu$ M TS\_qPCR and 2.5  $\mu$ M RT\_Hex\_qPCR  
263 primer mix, 4  $\mu$ l of diluted cDNA template), and then cycled on a Bio-Rad CFX96 thermal  
264 cycler with the following conditions: 95°C for 45 s, followed by 35 cycles of 95°C for 5 s and

265 60°C for 30 s. The optimal cycle number of the undiluted 1st strand of cDNA was calculated  
266 based on the quantification cycle (C<sub>q</sub>) number of the diluted samples.

267 Each sample was then barcoded with a unique pair of indexed primers. A PCR master  
268 mix was prepared for a 7 µl per-sample reaction volume (4 µl of 5x Phusion buffer, 0.4 µl of  
269 10 mM dNTPs, 2.4 µl of nuclease-free water, and 0.2 µl of Phusion polymerase), then mixed  
270 with 8 µl of purified (undiluted) first strand cDNA. 2.5 µl each of forward and reverse  
271 barcode primers was thoroughly mixed into each individual sample and PCR was performed  
272 according to the predetermined optimum cycle number according to the following: 1 cycle of  
273 98°C for 10 s (with the block pre-heated to 80°C), x cycles of 98°C for 5 s, 58°C for 10 s,  
274 72°C for 20 s, then 1 cycle of 72°C for 5 min, where x is the optimal cycle number specific to  
275 each sample.

276 After the barcoding process, cDNA was cleaned up with MagNA magnetic beads  
277 similarly to the first strand cDNA clean-up, but with 17 µl of beads instead of 9.5 µl, the  
278 replacement of 80% ethanol with 70% ice-cold ethanol, and the elution of DNA with 20 µl of  
279 10 mM Tris pH 8.0 instead of nuclease-free water.

280 Barcoded samples were serially diluted to a 1:10,000 dilution and sample quantity was  
281 determined using Library Quant Master Mix for Illumina (NEBNext<sup>®</sup> E7630). qPCR reactions  
282 were set up in duplicate on the diluted template according to the kit instructions, except all  
283 volumes were halved. Samples were then pooled according to the qPCR quantifications to  
284 achieve equimolarity. The pooled, equimolar, cDNA library was sequenced using a custom  
285 read 1 primer at the Biomolecular Resource Facility (BRF) at Australian National University  
286 on a NovaSeq6000 SP machine (2 x 50 bp paired end sequencing). All primers used during  
287 this protocol are documented in the Supporting Information (Table S1).

#### 288 *Gene expression analysis*

289 Raw sequence reads were checked for quality using FastQC (Andrews, 2010; freely available

290 at: <https://www.bioinformatics.babraham.ac.uk/projects/download.html#fastqc>) and then  
291 mapped to the *H. armigera* reference genome using STAR ver. 2.7.2b (Dobin et al., 2013).  
292 STAR was also used to produce a table of gene counts using default settings.

293 Differential gene expression (DGE) analysis was performed in R using various  
294 packages, including edgeR ver. 3.26.8 (Robinson et al., 2010), limma ver. 3.40.6 (Smyth,  
295 2005), and ggplot2. First, genes that were unexpressed or not expressed at biologically  
296 meaningful levels were filtered in order to reduce mean-variance from low count data in  
297 further analysis. For a gene to be retained, it needed to be counted at least ten times and  
298 present across at least two replicates. Gene expression distributions were then normalised with  
299 calcNormFactors from edgeR to ensure that differences in sequencing depth between  
300 replicates did not skew results. A multi-dimensional scaling (MDS) analysis was performed  
301 using the function plotMDS from limma to visualise differences and similarities between  
302 samples in the top 1,000 most highly-expressed genes. Finally, DGE analysis was performed  
303 using the voom workflow from limma and a list of the DE (up- and down-regulated) genes  
304 was generated.

### 305 *Gene ontology analysis*

306 Gene Ontology (GO) analysis was performed to indicate which GO terms were over- or  
307 under-represented in the table of DE genes. This analysis was conducted in R, using the  
308 doSNOW ver. 1.0.18 (available at:  
309 <https://cran.r-project.org/web/packages/doSNOW/index.html>) and foreach ver. 1.4.7  
310 (available at: <https://cran.r-project.org/web/packages/foreach/index.html>) packages. A custom  
311 script developed by Dr. Darren Wong was used to match the gene names of DE genes against  
312 a table of characterised GO terms using a mapping file obtained from Pearce et al. (2017).

313

## 314 **Results**

## 315 Developmental phenotypes

### 316 *Weight*

317 The mean weight profile of control and stressed samples is shown in Figure 1. All samples  
318 increased in mean weight to ~0.4-0.5 g as growing caterpillars, then declined towards a final  
319 lower mean weight (~0.15 g) that was relatively consistent among treatment and control  
320 groups (Fig. 1A). Though the general pattern was similar for all samples/treatments, there  
321 were some differences. Firstly, the mean weight of control samples more rapidly increased at  
322 the beginning of the experiment. Secondly, the timing of peaks and declines differed between  
323 the three groups, for example control samples peaked in mean weight at day 12, while  
324 paraquat 0.3 mM and 0.4 mM peaked later (days 22, and 32, respectively; Fig. 1A). These  
325 differences were significant between the control and stressed groups - control samples had the  
326 highest mean weight from day four to day 16 ( $F_{2,27}=47.613$ ,  $F_{2,26}=76.771$ ,  $F_{2,22}=497.884$ ,  
327  $F_{2,23}=69.012$  for days 4, 8, 12, and 16, respectively;  $P<0.001$  for all) and from days 32 to 36  
328 (day 32:  $F_{2,17}=34.874$ , day 36:  $F_{2,17}=14.297$ ;  $P<0.001$  for both) - but not between the two  
329 paraquat stressed groups, except for on day 20, when the 0.3 mM stressed samples were, on  
330 average, significantly heavier than their 0.4 mM counterparts ( $F_{2,23}=7.387$ ;  $P<0.001$ ;  
331 Supporting Information Fig. S1). To account for differences in development, we also  
332 compared mean weight at the same developmental stage, finding no significant differences  
333 across treatment groups ( $F_{2,20}=0.49$ ,  $P=0.952$ ;  $F_{2,19}=1.064$ ,  $P=0.365$ ;  $F_{2,15}=3.192$ ,  $P=0.070$  for  
334 caterpillar, pupa, and moth stages, respectively; Fig. 1B).

### 335 *Developmental rate*

336 Developmental rate was measured as the percentage of samples presenting as a given  
337 developmental stage on the day of measurement. Based on this metric, paraquat-stressed  
338 samples had a significantly slower developmental rate compared to the controls (Fig. 2). For  
339 example, by day eight, more than 95% of control samples had reached 4th-instar, while the

340 majority of stressed samples were only at either 2nd or 3rd-instar ( $F_{2,6}=3274.973$ ,  $P<0.001$ ;  
341 Fig. 2A). There was a similar trend from day 12 to day 24 – control samples had consistently  
342 reached a later developmental stage than stressed samples (day 12:  $F_{2,6}=5410.838$ , day 16:  
343  $F_{2,6}=5747.006$ , day 20:  $F_{2,6}=964.347$ , day 24:  $F_{2,6}=51.028$ ;  $P<0.001$  for all; Fig. 2B,C,  
344 Supporting Information Fig. S2). As for weight, the developmental rate of stressed samples  
345 was not significantly different between 0.3 mM and 0.4 mM paraquat on most measurement  
346 days (Fig. 2A, Supporting Information Fig. S2).

347 Interestingly, Figure 2 shows that stressed samples not only reached developmental  
348 stages at a slower rate, but also had higher variation in the percentage of samples present at  
349 each stage, compared to the controls. On any given day, the majority (>85%) of control  
350 samples were at the same developmental stage as each other, while stressed samples were not.  
351 For example, on day 24, ~96% of the control samples had pupated, while the stressed samples  
352 were represented in all developmental stages except 1st-instar (Fig. 2C).

### 353 *Lifespan*

354 Differences in developmental rate translated into differences in average time spent in each  
355 developmental stage and in overall average lifespan across the treatment groups and controls.  
356 The mean time spent as a caterpillar (from the day of hatching to pupation) for males and  
357 females within the same treatment group was not significantly different, however the control  
358 group took significantly less time (~15 days) to pupate than both stressed groups (~25 and  
359 ~28 days for 0.3 mM and 0.4 mM, respectively;  $F_{5,276}=144.966$ ,  $P<0.001$ ; Fig. 3A). In  
360 contrast, there were no significant differences in pupation period among the treatment groups,  
361 but the pupation period of male samples was ~2 days longer on average than that of females  
362 for the control group ( $F_{5,260}=5.280$ ,  $P<0.001$ ; Fig. 3B). Finally, mean time spent as moths  
363 across all three groups was not significantly different ( $F_{5,236}=0.761$ ,  $P=0.578$ ; Fig. 3C).

364 Overall lifespan refers to the time from hatching to death and is shown in Figure 3D,

365 where the general pattern is an extended average lifespan in stressed samples relative to  
366 controls ( $F_{5,234}=16.748$ ,  $P<0.001$ ). Specifically, the male paraquat-stressed group (0.3 mM and  
367 0.4 mM) had a significantly longer (~8-9 days) mean lifespan than the male and female  
368 controls and were not significantly different from each other (Fig. 3D). For females, the  
369 paraquat 0.4 mM group had a longer overall mean lifespan than the control group, but the  
370 paraquat 0.3 mM group was not significantly different to either the control or paraquat 0.4mM  
371 groups (Fig. 3D).

### 372 *Mortality*

373 The percent mortality profile of control and stressed samples is presented in Figure 4. All  
374 treatment groups had an individual two-daily mortality percentage of around 4-5.5% at the  
375 early stages of the experiment and this declined to <3% after day six for control and paraquat  
376 0.3 mM groups. However, in the paraquat 0.4 mM group, two-daily mortality rates reached 3-  
377 5% for days 14, 16, 20, 24, and 26 (Fig. 4A). Overall mortality as a caterpillar reached ~16-  
378 26% and was not significantly different across treatments ( $F_{2,6}=1.264$ ,  $P=0.348$ ; Fig. 4B).

### 379 Gene expression and ontology

#### 380 *Differential gene expression*

381 An MDS plot of gene expression patterns among the top 1,000 most highly-expressed genes  
382 for 4th-instar caterpillars (both control and paraquat stressed samples) indicated that control  
383 and paraquat stressed samples show different patterns of gene expression, while 0.3 mM and  
384 0.4 mM stressed samples cluster very similarly (Supporting Information Fig. S3). Therefore,  
385 we chose to analyse the data as stressed ( $n = 8$ ) vs. control ( $n = 4$ ) samples, although we also  
386 analysed pairwise comparisons (control vs. paraquat 0.3 mM and control vs. paraquat 0.4  
387 mM) and obtained very similar results (data not shown).

388 In total, there were 1,618 up-regulated genes, 10,572 that were not significantly  
389 different, and 761 genes that were down-regulated in the DGE analysis. The full list of



390 significantly (adjusted  $P < 0.05$ ) up- and down-regulated genes between control and stressed  
391 samples is shown in Supporting Information Table S2. Among the up-regulated genes were  
392 *caspase-4* and *meiosis arrest female 1 homolog protein*, while *collagen alpha-1(II) chain-like*  
393 gene was among the down-regulated (Supporting Information Table S2).

#### 394 *Gene ontology*

395 Gene ontology (GO) analysis has the overall goal of identifying the functions of genes that are  
396 up- and down-regulated across treatment groups which are over-represented in the data.  
397 Functions are classified in terms of molecular function (MF), cellular component (CC), and  
398 biological process (BP). Overall, GO terms for 13 MF, two CC, and ten BP were enriched in  
399 the up-regulated gene set for paraquat stressed samples vs. controls, while GO terms for three  
400 BPs were enriched in the down-regulated gene set (Table 1).

401 For the MF subset, significantly (based on a False Discovery Rate;  $FDR > 0.5$ ) over-  
402 represented GO terms for up-regulated genes included oxido-reductase activity, chitin binding  
403 and cuticle, structural constituent of cuticle, flavin adenine dinucleotide binding, and fatty-  
404 acyl-CoA reductase (Table 1). The two over-represented GO terms corresponding to CC had  
405 functions related to nucleus and plasma membranes. Finally, the BP-related GO terms for the  
406 up-regulated gene set had functions involving glycine metabolism, transmembrane transport,  
407 ribosome biogenesis, signal transduction, and carbohydrate metabolism, and for the down-  
408 regulated gene set, were related to functions including proteolysis, regulation of striated  
409 muscle tissue development, and chitin catabolism (Table 1).

410

#### 411 **Discussion**

412 In this work, we investigated the physical and biochemical effects of paraquat-induced  
413 chronic oxidative stress on the pest moth *H. armigera*. We showed that exposure to moderate  
414 doses of paraquat slows development, elongates lifespan, and leads to the up-regulation of

415 genes involved in detoxification (glycine metabolism), cuticle metabolism, and oxidation-  
416 reduction processes. However, no effect was observed on overall mortality, body weight, or  
417 time spent in other developmental stages.

#### 418 Developmental delay and extended lifespan

419 Our results suggest that chronic oxidative stress lengthens lifespan in *H. armigera* by slowing  
420 down development at the larval stages (~25-28 days as larvae vs. ~15 days, for stressed vs.  
421 control groups, respectively). Another study similarly showed that oxidative stress (paraquat)  
422 can slow pupal development and therefore lengthen lifespan in *H. armigera* (Zhang et al.,  
423 2017). Meanwhile, Pearce et al. (2017) found that lower quality host plants lead to slowed  
424 development rates in *H. armigera*. For example, a diet of *Arabidopsis* resulted in larvae  
425 requiring almost 13 days to reach 4th-instar, while larvae fed on cotton took only ~8 days to  
426 reach the same developmental stage (Pearce et al., 2017). In addition, these authors found  
427 that, at 4th-instar, larvae fed on *Arabidopsis* weighed only ~25 mg while larvae fed on a lab-  
428 diet weighed up to 50 mg. Combined with our results, this collective work suggests that  
429 developmental delay leading to lifespan extension under stress may be a common  
430 phenomenon in invertebrate species.

431         Indeed, the scenario of ROS extending lifespan has also been found in other  
432 invertebrates, including *D. melanogaster* (Hercus et al., 2003) and *C. elegans* (Lithgow &  
433 Walker, 2002). In the former study, the intriguing hypothesis of hormesis was raised to  
434 explain the fact that a compound that has an inhibitory or toxic effect at high doses can  
435 actually be beneficial at low doses (*sensu* Mattson, 2008). In fact, there is substantial research  
436 regarding hormesis due to the impacts of environmental stress on aging and longevity in  
437 invertebrate species (Le Bourg, 2009; Hunt et al., 2011; Scharf et al., 2017; Gilad et al., 2018;  
438 Mir & Qamar, 2018), including *Helicoverpa* (Ahn et al., 2011; Celorio-Mancera et al., 2011;  
439 Gulzar & Wright, 2015). In our case chronic oxidative stress extended the larval period in *H.*

440 *armigera*, which is the developmental stage that causes the most damage to crops. This  
441 finding would therefore potentially have significant agricultural impacts should it occur in the  
442 wild, affecting the efficiency of reproduction in *H. armigera* (i.e., an extended caterpillar  
443 period would presumably delay reproductive events and lengthen the duration of vulnerability  
444 as larvae to natural enemies), and survival (i.e., prolonging exposure to predators, parasites,  
445 and disease). Further research (e.g. modelling of population growth under different times  
446 spent as a caterpillar) is needed in order to better determine the agricultural and potential  
447 economic effects of extended development in *H. armigera* under stressful conditions.

#### 448 Genes and pathways

449 Our results suggest that oxidative stress leads to retardation of developmental processes. The  
450 majority of research suggests that stress-induced cell death in *H. armigera* and other species  
451 occurs via the FoxO (Zhang et al., 2017) or p53 (Liu & Xu, 2011; Hori et al., 2013) pathways.  
452 However, we did not find genes in these pathways to be significantly differentially expressed.  
453 Instead, significant up-regulation of caspase and meiosis arrest female 1 genes was detected in  
454 response to stress and these genes were also differentially expressed across one or more diets  
455 when the larvae were raised on various stressful hosts in the work of Pearce et al. (2017).  
456 Caspases are a family of proteases that play a crucial role in inflammation and cell death  
457 (Galluzzi et al., 2016). Although the function of *caspase-4* is not yet fully understood, it may  
458 be associated with stress-induced apoptosis in Lepidoptera (Courtiade et al., 2011), and up-  
459 regulation of caspase proteins in response to stress has been shown in the diamondback moth,  
460 *Plutella xylostella* (Zhuang et al., 2011) and the Egyptian cotton leafworm, *Spodoptera*  
461 *littoralis* (Liu et al., 2005). Research on *meiosis arrest female 1 (MARF1)* is limited - it is a  
462 novel vertebrate gene expressed exclusively in germ cells of the embryonic ovary and the  
463 adult testis (Arango et al., 2013). Though it is suggested to have a role in cell proliferation  
464 arrest in mice (Arango et al., 2013), and its up-regulation leads to deceleration of germline

465 development in humans (Su et al., 2012), its' role in insects, and in somatic development, is  
466 completely unclear. However, both *caspase-4* and *MARF1* appear to be important in stress  
467 responses in *H. armigera*, according to both our gene expression analyses and those of Pearce  
468 et al. (2017). These findings thus provide a basis for future work investigating the  
469 mechanisms underlying delayed development in response to oxidative stress in *H. armigera*.

470 Our gene expression analysis also identified an up-regulation of glycine metabolism,  
471 which has been shown to mitigate stress effects in mammals (Alves et al., 2019). Glycine is a  
472 non-essential amino acid involved in cryoprotection, anti-inflammation, and detoxification,  
473 and is also a crucial precursor of glutathione (an antioxidant molecule; Pérez-Torres et al.,  
474 2016). Thus, up-regulation of the glycine metabolic pathway may reduce the impact of toxic  
475 ROS on *H. armigera* during oxidative stress. An up-regulation of detoxification processes  
476 was also found in Pearce et al. (2017) following exposure to stressful diets. In total, these  
477 authors found 1,882 differentially expressed genes, of which 185 were from detoxification or  
478 digestion-related families (Pearce et al., 2017).

479 We also found an over-representation of genes involved in the structural constituent of  
480 cuticle, and of chitin metabolism, along with an under-representation of chitin catabolic  
481 processes in response to stress in *H. armigera*. Chitin functions to support the cuticles of the  
482 epidermis and trachea in insects, as well as the membranes that line the gut (Merzendorfer &  
483 Zimoch, 2003). Growth and cuticle-related genes also featured heavily in the up- and down-  
484 regulated gene lists of Pearce et al. (2017) and tens of these overlapped with those in our  
485 significant gene list. In general, 499 of the 1,882 differentially expressed genes in Pearce et al.  
486 (2017) overlapped with our set of 2,379, which is highly significant (hypergeometric test  
487  $P=16.8 \times 10^{-22}$ ) and suggestive of commonalities among transcriptomic stress responses,  
488 whatever the underlying trigger.

489 Interestingly, we also found that ecdysteroid (molting hormone) was up-regulated in

490 stressed samples (1.5 fold change;  $P=0.002$ ), while juvenile hormone (JH) was down-  
491 regulated (4.8 fold change;  $P=0.0009$ ). Nutrition regulates growth and development in the  
492 majority of insects via levels of JH (Gotoh et al., 2014; Breed & Moore, 2015). Thus, lower  
493 nutrient absorption in stressed samples could be responsible for the down-regulation of JH if  
494 paraquat has damaging effects on the midgut (see Ahmad, 1995). Indeed, paraquat has known  
495 lipid peroxidation outcomes in invertebrates thus, lipid-dependent processes in insects are  
496 likely to be critically affected by oxidative stress - this includes the synthesis of ecdysone, JH,  
497 and other lipids that act as pheromones (Downer, 1985; Ahmad, 1995). Stress has been shown  
498 to interrupt hormone systems, resulting in down-regulation of JH in *Drosophila* (Kodrík et al.,  
499 2015), as well as honey bees (Lin et al., 2004) and the tobacco hawk moth, *Manduca sexta*  
500 (Tauchman et al., 2007). Depressed JH has also been shown to lead to a delay in ovary  
501 maturation in *Drosophila* (Saunders et al., 1990), and to longer diapause periods in flesh flies  
502 (Walker & Denlinger, 1980). In addition, recent research suggests that JH leads to increased  
503 levels of oxidative stress in the damselfly (Martínez-Lendeche et al., 2019). Thus, molting and  
504 growth hormones could play a role in oxidative stress responses more generally and the  
505 relationship between hormone regulation and delayed development, as measured here in *H.*  
506 *armigera*, warrants further investigation.

507         Finally, a fundamental response to oxidative stress is the up-regulation of antioxidant  
508 enzymes, such as superoxide dismutase, catalase, and glutathione peroxidase, to reduce levels  
509 of oxidative damage by transforming ROS into non-toxic products (Halliwell, 1999; Mittler,  
510 2002). Such responses are seen in an array of species (e.g., the southern armyworm,  
511 *Spodoptera eridania*, War et al., 2012; *D. melanogaster*, Arking et al., 2000), including *H.*  
512 *armigera* following exposure to high levels of UV-induced oxidative stress over time (Meng  
513 et al., 2009; Wang et al., 2012). However, though we did find an over-representation of genes  
514 involved in oxidation-reduction processes and nominal up-regulation, we did not find

515 significant ( $P < 0.05$ ) up-regulation of these common antioxidant enzymes (superoxide  
516 dismutase: 3.1 fold change,  $P = 0.075$ ; glutathione peroxidase: 2.1 fold change;  $P = 0.045$ ).

### 517 Summary

518 Previous research indicated that oxidative stress can impact cell senescence, apoptosis, and  
519 biochemical and metabolic pathways to have potentially strong effects on fitness. Here, we  
520 found that oxidative stress had marked effects on both development and gene expression in *H.*  
521 *armigera*. In particular, we found that, potentially linked to the hormesis hypothesis, sub-  
522 lethal paraquat exposure slowed down developmental rate, leading to a longer time spent as  
523 caterpillars and overall lifespan extension. Unresolved questions include whether this would  
524 be an advantage in the field and whether reproduction or other fitness-based traits were  
525 affected. At a molecular level, we further found that genes related to various developmental  
526 and detoxification processes were differentially expressed in response to stress. Collectively,  
527 these results advance our understanding of how *H. armigera* copes with stress and may help  
528 explain why this moth has become such a major pest.

529

### 530 **Acknowledgements**

531 We would like to thank Megan Head for early advice on experimental design, NBA's  
532 advisory panel at the Australian National University (Rod Peakall, Maja Adamska, Benjamin  
533 Schwessinger) for feedback on the early experimental design and the final thesis document,  
534 and Marcin Adamski and Darren Wong for assistance with gene expression, and gene  
535 ontology, analysis, respectively. We thank Chris Coppin for RNA library prep assistance,  
536 Amanda Padovan, Rachael Remington, and Theodore Colls for providing feedback on earlier  
537 drafts of this work, and Stephen Pearce and members of the Moritz lab group for helpful  
538 discussion. This project was supported through funding from the Australian Research Council  
539 (Discovery Early Career Researcher Award DE160100685 to AM), the Centre for

- 540 Biodiversity Analysis (Ignition Grant to AM), and Commonwealth Scientific and Industrial  
541 Research Organisation Land and Water.

## 542 References

- 543 Abdollahi, M., Ranjbar, A., Shadnia, S., Nikfar, S., & Rezaie, A. (2004). Pesticides and  
544 oxidative stress: a review. *Medical Science Monitor: International Medical Journal of*  
545 *Experimental and Clinical Research*, 10(6), RA141–RA147.
- 546 Adamo, S. A. (2012). The effects of the stress response on immune function in invertebrates:  
547 An evolutionary perspective on an ancient connection. In *Hormones and Behavior*  
548 (Vol. 62, Issue 3, pp. 324–330). <https://doi.org/10.1016/j.yhbeh.2012.02.012>
- 549 Ahmad, S. (1995). Oxidative stress from environmental pollutants. In *Archives of Insect*  
550 *Biochemistry and Physiology* (Vol. 29, Issue 2, pp. 135–157).  
551 <https://doi.org/10.1002/arch.940290205>
- 552 Ahn, S.-J., Badenes-Pérez, F. R., & Heckel, D. G. (2011). A host-plant specialist, *Helicoverpa*  
553 *assulta*, is more tolerant to capsaicin from *Capsicum annuum* than other noctuid  
554 species. *Journal of Insect Physiology*, 57(9), 1212–1219.
- 555 Alves, A., Bassot, A., Bulteau, A.-L., Pirola, L., & Morio, B. (2019). Glycine Metabolism and  
556 Its Alterations in Obesity and Metabolic Diseases. *Nutrients*, 11(6).  
557 <https://doi.org/10.3390/nu11061356>
- 558 Anderson, C. J., Tay, W. T., McGaughran, A., Gordon, K., & Walsh, T. K. (2016). Population  
559 structure and gene flow in the global pest, *Helicoverpa armigera*. *Molecular Ecology*,  
560 25(21), 5296–5311.
- 561 Andrews, S. (2010). *FastQC: A quality control tool for high throughput sequence data*.  
562 <https://www.bioinformatics.babraham.ac.uk/projects/fastqc/>
- 563 Arango, N. A., Li, L., Dabir, D., Nicolau, F., Pieretti-Vanmarcke, R., Koehler, C., McCarrey,  
564 J. R., Lu, N., & Donahoe, P. K. (2013). Meiosis I arrest abnormalities lead to severe  
565 oligozoospermia in meiosis 1 arresting protein (M1ap)-deficient mice. *Biology of*  
566 *Reproduction*, 88(3), 76.
- 567 Arking, R., Burde, V., Graves, K., Hari, R., Feldman, E., Zeevi, A., Soliman, S., Saraiya, A.,  
568 Buck, S., Vettraino, J., Sathrasala, K., Wehr, N., & Levine, R. L. (2000). Forward and  
569 reverse selection for longevity in *Drosophila* is characterized by alteration of  
570 antioxidant gene expression and oxidative damage patterns. *Experimental Gerontology*,  
571 35(2), 167–185.
- 572 Aucoin, R. R., Philogène, B. J. R., & Arnason, J. T. (1991). Antioxidant enzymes as  
573 biochemical defenses against phototoxin-induced oxidative stress in three species of  
574 herbivorous lepidoptera. In *Archives of Insect Biochemistry and Physiology* (Vol. 16,  
575 Issue 2, pp. 139–152). <https://doi.org/10.1002/arch.940160206>
- 576 Betteridge, D. J. (2000). What is oxidative stress? In *Metabolism* (Vol. 49, Issue 2, pp. 3–8).  
577 [https://doi.org/10.1016/s0026-0495\(00\)80077-3](https://doi.org/10.1016/s0026-0495(00)80077-3)
- 578 Blumberg, J. (2004). Use of Biomarkers of Oxidative Stress in Research Studies. In *The*  
579 *Journal of Nutrition* (Vol. 134, Issue 11, p. 3188S – 3189S). [https://doi.org/10.1093/jn/](https://doi.org/10.1093/jn/134.11.3188s)  
580 134.11.3188s
- 581 Breed, M. D., & Moore, J. (2015). *Animal Behavior*. Academic Press.
- 582 Celorio-Mancera, M. de la P., Ahn, S.-J., Vogel, H., & Heckel, D. G. (2011). Transcriptional  
583 responses underlying the hormetic and detrimental effects of the plant secondary  
584 metabolite gossypol on the generalist herbivore *Helicoverpa armigera*. *BMC Genomics*,  
585 12, 575.
- 586 Courtiade, J., Pauchet, Y., Vogel, H., & Heckel, D. G. (2011). A comprehensive  
587 characterization of the caspase gene family in insects from the order Lepidoptera. *BMC*  
588 *Genomics*, 12, 357.
- 589 Czepak, C., Albernaz, K. C., Vivan, L. M., Guimarães, H. O., & Carvahais, T. (2013).  
590 Primeiro registro de ocorrência de *Helicoverpa armigera* (Hübner) (Lepidoptera):



- 591 Noctuidae) no Brasil. In *Pesquisa Agropecuária Tropical* (Vol. 43, Issue 1, pp. 110–  
592 113). <https://doi.org/10.1590/s1983-40632013000100015>
- 593 Dobin, A., Davis, C. A., Schlesinger, F., Drenkow, J., Zaleski, C., Jha, S., Batut, P., Chaisson,  
594 M., & Gingeras, T. R. (2013). STAR: ultrafast universal RNA-seq aligner.  
595 *Bioinformatics*, 29(1), 15–21.
- 596 Downer, R. G. H. (1985). Lipid Metabolism. In *Biochemistry* (pp. 77–113).  
597 <https://doi.org/10.1016/b978-0-08-030811-1.50009-x>
- 598 Feng, H.-Q., Wu, K.-M., Cheng, D.-F., & Guo, Y.-Y. (2004). Northward migration of  
599 *Helicoverpa armigera* (Lepidoptera: Noctuidae) and other moths in early summer  
600 observed with radar in northern China. *Journal of Economic Entomology*, 97(6), 1874–  
601 1883.
- 602 Finkel, T., & Holbrook, N. J. (2000). Oxidants, oxidative stress and the biology of ageing. In  
603 *Nature* (Vol. 408, Issue 6809, pp. 239–247). <https://doi.org/10.1038/35041687>
- 604 Galluzzi, L., López-Soto, A., Kumar, S., & Kroemer, G. (2016). Caspases Connect Cell-  
605 Death Signaling to Organismal Homeostasis. *Immunity*, 44(2), 221–231.
- 606 Gilad, T., Koren, R., Moalem, Y., Subach, A., & Scharf, I. (2018). Effect of continuous and  
607 alternating episodes of starvation on behavior and reproduction in the red flour beetle.  
608 In *Journal of Zoology* (Vol. 305, Issue 4, pp. 213–222).  
609 <https://doi.org/10.1111/jzo.12556>
- 610 Gotoh, H., Miyakawa, H., Ishikawa, A., Ishikawa, Y., Sugime, Y., Emlen, D. J., Lavine, L.  
611 C., & Miura, T. (2014). Developmental link between sex and nutrition; doublesex  
612 regulates sex-specific mandible growth via juvenile hormone signaling in stag beetles.  
613 *PLoS Genetics*, 10(1), e1004098.
- 614 Gulzar, A., & Wright, D. J. (2015). Sub-lethal effects of Vip3A toxin on survival,  
615 development and fecundity of *Heliothis virescens* and *Plutella xylostella*.  
616 *Ecotoxicology*, 24(9), 1815–1822.
- 617 Halliwell, B. (1999). Antioxidant defence mechanisms: from the beginning to the end (of the  
618 beginning). *Free Radical Research*, 31(4), 261–272.
- 619 Halliwell, B., & Gutteridge, J. M. C. (1984). Oxygen toxicity, oxygen radicals, transition  
620 metals and disease. In *Biochemical Journal* (Vol. 219, Issue 1, pp. 1–14).  
621 <https://doi.org/10.1042/bj2190001>
- 622 Hercus, M. J., Loeschcke, V., & Rattan, S. I. S. (2003). Lifespan extension of *Drosophila*  
623 *melanogaster* through hormesis by repeated mild heat stress. *Biogerontology*, 4(3),  
624 149–156.
- 625 Hori, Y. S., Kuno, A., Hosoda, R., & Horio, Y. (2013). Regulation of FOXOs and p53 by  
626 SIRT1 modulators under oxidative stress. *PloS One*, 8(9), e73875.
- 627 Hunt, P. R., Son, T. G., Wilson, M. A., Yu, Q.-S., Wood, W. H., Zhang, Y., Becker, K. G.,  
628 Greig, N. H., Mattson, M. P., Camandola, S., & Wolkow, C. A. (2011). Extension of  
629 Lifespan in *C. elegans* by Naphthoquinones That Act through Stress Hormesis  
630 Mechanisms. In *PLoS ONE* (Vol. 6, Issue 7, p. e21922).  
631 <https://doi.org/10.1371/journal.pone.0021922>
- 632 Imlay, J. A. (2003). Pathways of Oxidative Damage. In *Annual Review of Microbiology* (Vol.  
633 57, Issue 1, pp. 395–418). <https://doi.org/10.1146/annurev.micro.57.030502.090938>
- 634 Jessop, T. S., Letnic, M., Webb, J. K., & Dempster, T. (2013). Adrenocortical stress responses  
635 influence an invasive vertebrate’s fitness in an extreme environment. In *Proceedings of*  
636 *the Royal Society B: Biological Sciences* (Vol. 280, Issue 1768, p. 20131444).  
637 <https://doi.org/10.1098/rspb.2013.1444>
- 638 Kaufmann, J., & Schering, A. G. (2014). Analysis of Variance ANOVA. In *Wiley*  
639 *Encyclopedia of Clinical Trials*. <https://doi.org/10.1002/9780471462422.eoct017>
- 640 Kim, J., Shin, S. D., Jeong, S., Suh, G. J., & Kwak, Y. H. (2017). Effect of prohibiting the use

- 641 of Paraquat on pesticide-associated mortality. *BMC Public Health*, 17(1), 858.
- 642 Kodrík, D., Bednářová, A., Zemanová, M., & Krishnan, N. (2015). Hormonal Regulation of  
643 Response to Oxidative Stress in Insects—An Update. In *International Journal of*  
644 *Molecular Sciences* (Vol. 16, Issue 10, pp. 25788–25816).  
645 <https://doi.org/10.3390/ijms161025788>
- 646 Kregel, K. C., & Zhang, H. J. (2007). An integrated view of oxidative stress in aging: basic  
647 mechanisms, functional effects, and pathological considerations. *American Journal of*  
648 *Physiology. Regulatory, Integrative and Comparative Physiology*, 292(1), R18–R36.
- 649 Krishnan, N., Kodrík, D., Turanli, F., & Sehnal, F. (2007). Stage-specific distribution of  
650 oxidative radicals and antioxidant enzymes in the midgut of *Leptinotarsa decemlineata*.  
651 *Journal of Insect Physiology*, 53(1), 67–74.
- 652 Kriticos, D. J., Ota, N., Hutchison, W. D., Beddow, J., Walsh, T., Tay, W. T., Borchert, D.  
653 M., Paula-Moraes, S. V., Czepak, C., & Zalucki, M. P. (2015). The potential  
654 distribution of invading *Helicoverpa armigera* in North America: is it just a matter of  
655 time? *PloS One*, 10(3), e0119618.
- 656 Krůček, T., Korandová, M., Šerý, M., Frydrychová, R. Č., Krůček, T., Korandová, M., &  
657 Szakosová, K. (2015). Effect of low doses of herbicide paraquat on antioxidant defense  
658 in *Drosophila*. *Archives of Insect Biochemistry and Physiology*, 88(4), 235–248.
- 659 Langevin, S. A., Bent, Z. W., Solberg, O. D., Curtis, D. J., Lane, P. D., Williams, K. P.,  
660 Schoeniger, J. S., Sinha, A., Lane, T. W., & Branda, S. S. (2013). Peregrine: A rapid  
661 and unbiased method to produce strand-specific RNA-Seq libraries from small  
662 quantities of starting material. *RNA Biology*, 10(4), 502–515.
- 663 Le Bourg, E. (2009). Hormesis, aging and longevity. *Biochimica et Biophysica Acta*,  
664 1790(10), 1030–1039.
- 665 Lin, H., Dusset, C., & Huang, Z. Y. (2004). Short-term changes in juvenile hormone titers in  
666 honey bee workers due to stress. In *Apidologie* (Vol. 35, Issue 3, pp. 319–327). <https://doi.org/10.1051/apido:2004018>
- 667  
668 Lithgow, G. J., & Walker, G. A. (2002). Stress resistance as a determinate of *C. elegans*  
669 lifespan. *Mechanisms of Ageing and Development*, 123(7), 765–771.
- 670 Liu, D., & Xu, Y. (2011). p53, Oxidative Stress, and Aging. In *Antioxidants & Redox*  
671 *Signaling* (Vol. 15, Issue 6, pp. 1669–1678). <https://doi.org/10.1089/ars.2010.3644>
- 672 Liu, Q., Qi, Y., & Chejanovsky, N. (2005). *Spodoptera littoralis* caspase-1, a Lepidopteran  
673 effector caspase inducible by apoptotic signaling. *Apoptosis: An International Journal*  
674 *on Programmed Cell Death*, 10(4), 787–795.
- 675 Lushchak, V. I. (2014). Free radicals, reactive oxygen species, oxidative stress and its  
676 classification. In *Chemico-Biological Interactions* (Vol. 224, pp. 164–175).  
677 <https://doi.org/10.1016/j.cbi.2014.10.016>
- 678 Martínez-Lendech, N., Osorio-Beristain, M., Franco, B., Pedraza-Reyes, M., Obregón, A., &  
679 Contreras-Garduño, J. (2019). Does juvenile hormone prompt oxidative stress in male  
680 damselflies? *The Journal of Experimental Biology*, 222(Pt 5).  
681 <https://doi.org/10.1242/jeb.194530>
- 682 Mattson, M. P. (2008). Hormesis defined. In *Ageing Research Reviews* (Vol. 7, Issue 1, pp. 1–  
683 7). <https://doi.org/10.1016/j.arr.2007.08.007>
- 684 McCormick, S. D., Shrimpton, J. M., Carey, J. B., O’Dea, M. F., Sloan, K. E., Moriyama, S.,  
685 & Th Björnsson, B. (1998). Repeated acute stress reduces growth rate of Atlantic  
686 salmon parr and alters plasma levels of growth hormone, insulin-like growth factor I  
687 and cortisol. In *Aquaculture* (Vol. 168, Issues 1-4, pp. 221–235).  
688 [https://doi.org/10.1016/s0044-8486\(98\)00351-2](https://doi.org/10.1016/s0044-8486(98)00351-2)
- 689 Meng, J.-Y., Zhang, C.-Y., Zhu, F., Wang, X.-P., & Lei, C.-L. (2009). Ultraviolet light-  
690 induced oxidative stress: effects on antioxidant response of *Helicoverpa armigera*

- 691 adults. *Journal of Insect Physiology*, 55(6), 588–592.
- 692 Merzendorfer, H., & Zimoch, L. (2003). Chitin metabolism in insects: structure, function and  
693 regulation of chitin synthases and chitinases. *The Journal of Experimental Biology*,  
694 206(Pt 24), 4393–4412.
- 695 Mir, A. H., & Qamar, A. (2018). Effects of Starvation and Thermal Stress on the Thermal  
696 Tolerance of Silkworm, *Bombyx mori*: Existence of Trade-offs and Cross-Tolerances.  
697 *Neotropical Entomology*, 47(5), 610–618.
- 698 Mittler, R. (2002). Oxidative stress, antioxidants and stress tolerance. In *Trends in Plant*  
699 *Science* (Vol. 7, Issue 9, pp. 405–410). [https://doi.org/10.1016/s1360-1385\(02\)02312-9](https://doi.org/10.1016/s1360-1385(02)02312-9)
- 700 Nadal, E. de, de Nadal, E., Ammerer, G., & Posas, F. (2011). Controlling gene expression in  
701 response to stress. In *Nature Reviews Genetics* (Vol. 12, Issue 12, pp. 833–845). [https://](https://doi.org/10.1038/nrg3055)  
702 [doi.org/10.1038/nrg3055](https://doi.org/10.1038/nrg3055)
- 703 Noor-Ul-Ane, M., Ali Mirhosseini, M., Crickmore, N., Saeed, S., Noor, I., & Zalucki, M. P.  
704 (2018). Temperature-dependent development of *Helicoverpa armigera* (Hübner)  
705 (Lepidoptera: Noctuidae) and its larval parasitoid, *Habrobracon hebetor* (Say)  
706 (Hymenoptera: Braconidae): implications for species interactions. *Bulletin of*  
707 *Entomological Research*, 108(3), 295–304.
- 708 Pearce, S. L., Clarke, D. F., East, P. D., Elfekih, S., Gordon, K. H. J., Jermiin, L. S.,  
709 McGaughran, A., Oakeshott, J. G., Papanicolaou, A., Perera, O. P., Rane, R. V.,  
710 Richards, S., Tay, W. T., Walsh, T. K., Anderson, A., Anderson, C. J., Asgari, S.,  
711 Board, P. G., Bretschneider, A., ... Wu, Y. D. (2017). Genomic innovations,  
712 transcriptional plasticity and gene loss underlying the evolution and divergence of two  
713 highly polyphagous and invasive *Helicoverpa* pest species. *BMC Biology*, 15(1), 63.
- 714 Pérez-Torres, I., Zuniga-Munoz, A., & Guarner-Lans, V. (2016). Beneficial Effects of the  
715 Amino Acid Glycine. In *Mini-Reviews in Medicinal Chemistry* (Vol. 17, Issue 1, pp.  
716 15–32). <https://doi.org/10.2174/1389557516666160609081602>
- 717 Rampon, C., Jiang, C. H., Dong, H., -P. Tang, Y., Lockhart, D. J., Schultz, P. G., Tsien, J. Z.,  
718 & Hu, Y. (2000). Effects of environmental enrichment on gene expression in the brain.  
719 In *Proceedings of the National Academy of Sciences* (Vol. 97, Issue 23, pp. 12880–  
720 12884). <https://doi.org/10.1073/pnas.97.23.12880>
- 721 R Core Team. (2019). *R: A language and environment for statistical computing*. R  
722 *Foundation for Statistical Computing, Vienna, Austria*. <http://www.R-project.org/>.
- 723 Richter, K., Haslbeck, M., & Buchner, J. (2010). The heat shock response: life on the verge of  
724 death. *Molecular Cell*, 40(2), 253–266.
- 725 Robinson, M. D., McCarthy, D. J., & Smyth, G. K. (2010). edgeR: a Bioconductor package  
726 for differential expression analysis of digital gene expression data. *Bioinformatics* ,  
727 26(1), 139–140.
- 728 Rohland, N., & Reich, D. (2012). Cost-effective, high-throughput DNA sequencing libraries  
729 for multiplexed target capture. *Genome Research*, 22(5), 939–946.
- 730 Saunders, D. S., Richard, D. S., Applebaum, S. W., Ma, M., & Gilbert, L. I. (1990).  
731 Photoperiodic diapause in *Drosophila melanogaster* involves a block to the juvenile  
732 hormone regulation of ovarian maturation. *General and Comparative Endocrinology*,  
733 79(2), 174–184.
- 734 Scharf, I., Daniel, A., MacMillan, H. A., & Katz, N. (2017). The effect of fasting and body  
735 reserves on cold tolerance in 2 pit-building insect predators. *Current Zoology*, 63(3),  
736 287–294.
- 737 Shadnia, S., Ebadollahi-Natanzi, A., Ahmadzadeh, S., Karami-Mohajeri, S., Pourshojaei, Y.,  
738 & Rahimi, H. R. (2018). Delayed death following paraquat poisoning: three case  
739 reports and a literature review. In *Toxicology Research* (Vol. 7, Issue 5, pp. 745–753).  
740 <https://doi.org/10.1039/c8tx00120k>

- 741 Shalev, I., Entringer, S., Wadhwa, P. D., Wolkowitz, O. M., Puterman, E., Lin, J., & Epel, E.  
742 S. (2013). Stress and telomere biology: a lifespan perspective.  
743 *Psychoneuroendocrinology*, 38(9), 1835–1842.
- 744 Smyth, G. K. (2005). limma: Linear Models for Microarray Data. In *Bioinformatics and*  
745 *Computational Biology Solutions Using R and Bioconductor* (pp. 397–420).  
746 [https://doi.org/10.1007/0-387-29362-0\\_23](https://doi.org/10.1007/0-387-29362-0_23)
- 747 Su, Y.-Q., Sun, F., Handel, M. A., Schimenti, J. C., & Eppig, J. J. (2012). Meiosis arrest  
748 female 1 (MARF1) has nuage-like function in mammalian oocytes. *Proceedings of the*  
749 *National Academy of Sciences of the United States of America*, 109(46), 18653–18660.
- 750 Tauchman, S. J., Lorch, J. M., Orth, A. P., & Goodman, W. G. (2007). Effects of stress on the  
751 hemolymph juvenile hormone binding protein titers of *Manduca sexta*. *Insect*  
752 *Biochemistry and Molecular Biology*, 37(8), 847–854.
- 753 Trakimas, G., Krams, R., Krama, T., Kortet, R., Haque, S., Luoto, S., Eichler Inwood, S.,  
754 Butler, D. M., Jöers, P., Hawlena, D., Rantala, M. J., Elferts, D., Contreras-Garduño, J.,  
755 & Krams, I. (2019). Ecological Stoichiometry: A Link Between Developmental Speed  
756 and Physiological Stress in an Omnivorous Insect. *Frontiers in Behavioral*  
757 *Neuroscience*, 13, 42.
- 758 Walker, G. P., & Denlinger, D. L. (1980). Juvenile hormone and moulting hormone titres in  
759 diapause- and non-diapause destined flesh flies. In *Journal of Insect Physiology* (Vol.  
760 26, Issue 10, pp. 661–664). [https://doi.org/10.1016/0022-1910\(80\)90038-4](https://doi.org/10.1016/0022-1910(80)90038-4)
- 761 Wang, Y., Wang, L., Zhu, Z., Ma, W., & Lei, C. (2012). The molecular characterization of  
762 antioxidant enzyme genes in *Helicoverpa armigera* adults and their involvement in  
763 response to ultraviolet-A stress. *Journal of Insect Physiology*, 58(9), 1250–1258.
- 764 War, A. R., Paulraj, M. G., Ahmad, T., Buhroo, A. A., Hussain, B., Ignacimuthu, S., &  
765 Sharma, H. C. (2012). Mechanisms of plant defense against insect herbivores. In *Plant*  
766 *Signaling & Behavior* (Vol. 7, Issue 10, pp. 1306–1320).  
767 <https://doi.org/10.4161/psb.21663>
- 768 Weake, V. M., & Workman, J. L. (2010). Inducible gene expression: diverse regulatory  
769 mechanisms. In *Nature Reviews Genetics* (Vol. 11, Issue 6, pp. 426–437).  
770 <https://doi.org/10.1038/nrg2781>
- 771 Wickham, H. (2016). Data Analysis. In *Use R!* (pp. 189–201). [https://doi.org/10.1007/978-3-](https://doi.org/10.1007/978-3-319-24277-4_9)  
772 [319-24277-4\\_9](https://doi.org/10.1007/978-3-319-24277-4_9)
- 773 Xiong, X., Michaud, J. P., Li, Z., Wu, P., Chu, Y., Zhang, Q., & Liu, X. (2015). Chronic,  
774 predator-induced stress alters development and reproductive performance of the cotton  
775 bollworm, *Helicoverpa armigera*. In *BioControl* (Vol. 60, Issue 6, pp. 827–837). [https://](https://doi.org/10.1007/s10526-015-9689-9)  
776 [doi.org/10.1007/s10526-015-9689-9](https://doi.org/10.1007/s10526-015-9689-9)
- 777 Zhang, X.-S., Wang, T., Lin, X.-W., Denlinger, D. L., & Xu, W.-H. (2017). Reactive oxygen  
778 species extend insect life span using components of the insulin-signaling pathway.  
779 *Proceedings of the National Academy of Sciences of the United States of America*,  
780 114(37), E7832–E7840.
- 781 Zhuang, H. M., Wang, K. F., Miyata, T., Wu, Z. J., Wu, G., & Xie, L. H. (2011).  
782 Identification and expression of caspase-1 gene under heat stress in insecticide-  
783 susceptible and -resistant *Plutella xylostella* (Lepidoptera: Plutellidae). *Molecular*  
784 *Biology Reports*, 38(4), 2529–2539.

785

## 786 **Data Accessibility**

787 Developmental data will be submitted to Dryad.

788 RNASeq data will be submitted to the Short Read Archive (SRA).

789

790 **Author Contributions**

791 AM designed the research with input from NBA and TKW, NBA performed the  
792 developmental assays with assistance from BJ and created the libraries for RNASeq, NBA  
793 analysed the phenotypic data and AM analysed the RNASeq data, NBA compiled this work  
794 into her Master's thesis with assistance from AM and TKW. AM re-worked and expanded the  
795 thesis text and figures into a manuscript and all authors contributed to the final version of the  
796 manuscript.

797 **Tables**

798

799 **Table 1.** Significantly over represented gene ontology (GO) terms for up- and down-regulated genes in stressed vs. control samples of *Helicoverpa*  
800 *armigera*.

801

| <b>GO term</b> | <b>Molecular Function</b>                      | <b>Cellular Component</b> | <b>Biological Process</b>          |
|----------------|------------------------------------------------|---------------------------|------------------------------------|
| Up-regulated   | Structural constituent of cuticle              | Nucleus                   | Chitin metabolic process           |
|                | Structural constituent of chitin-based cuticle | Plasma membrane           | Glycine metabolic process          |
|                | DNA binding                                    |                           | L-serine metabolic process         |
|                | Oxido-reductase activity                       |                           | Catecholamine biosynthetic process |
|                | Flavin adenine dinucleotide binding            |                           | Transmembrane transport            |
|                | Nucleic acid binding                           |                           | Oxidation-reduction process        |
|                | Choline dehydrogenase activity                 |                           | Threonine metabolic process        |
|                | Fatty-acyl-CoA reductase activity              |                           | Ribosome biogenesis                |
|                | Chitin binding                                 |                           | Alcohol metabolic process          |
|                | Protein binding                                |                           | Signal transduction                |
|                | Transporter activity                           |                           | Carbohydrate metabolic process     |
|                | Zinc ion binding                               |                           |                                    |
|                | ATP binding                                    |                           |                                    |

|                |  |  |                                                  |
|----------------|--|--|--------------------------------------------------|
| Down-regulated |  |  | Chitin catabolic process                         |
|                |  |  | Proteolysis                                      |
|                |  |  | Myoblast function                                |
|                |  |  | Regulation of striated muscle tissue development |

802 **Figure legends**

803

804 **Figure 1.** Mean weight following stress exposure in *Helicoverpa armigera*. Individual *H.*  
805 *armigera* were reared on an artificial diet mixed with 0.3 mM or 0.4 mM paraquat. Ten  
806 randomly-selected individuals were weighed every two days as caterpillars and twice a week  
807 as moths. Results are presented for stressed and control samples: (A) mean weight every two  
808 days from day four, and (B) at three different developmental stages. Differences between  
809 treatment and control groups in (B) were not found to be statistically significant (i.e., all fall  
810 into a single homogeneous group). In both graphs, error bars indicate standard deviation and  
811 colours represent control or treated samples according to the provided key.

812

813 **Figure 2.** Developmental stage progression following stress exposure in *Helicoverpa*  
814 *armigera*. Individual *H. armigera* were reared on an artificial diet mixed with 0.3 mM or 0.4  
815 mM paraquat and developmental stage was recorded every two days for control and stressed  
816 samples from the day that individuals hatched until death. Results are presented as the  
817 percentage of individuals representing each developmental stage (1st - 5th corresponding to  
818 instars, p-pu=pre-pupation; pu=pupae) at: (A) day eight; (B) day 16; (C) day 24. Significant  
819 differences among treatment and control groups are indicated by non-overlapping characters  
820 ('a', 'b'), error bars indicate standard deviation, and colours represent control or treated  
821 groups according to the provided key.

822

823 **Figure 3.** Lifespan following stress exposure in *Helicoverpa armigera*. Individual *H.*  
824 *armigera* were reared on an artificial diet mixed with 0.3 mM or 0.4 mM paraquat and time  
825 spent in each developmental period was recorded, as was overall lifespan (time from hatching  
826 to death). Results are presented as mean number of days spent as: (A) caterpillars; (B) pupae;  
827 and (C) moths. Overall lifespan is presented in (D). Significant differences among treatment  
828 and control groups are indicated by non-overlapping characters ('a', 'b', 'c', 'd') and error  
829 bars indicate standard deviation. Colours represent control or treated groups, and solid and  
830 dashed lines indicate females (F), and males (M), respectively, according to the provided key.  
831 Note the different y-axis scales across the four panels.

832

833 **Figure 4.** Mortality following stress exposure in *Helicoverpa armigera*. Individual *H.*  
834 *armigera* were reared on an artificial diet mixed with 0.3 mM or 0.4 mM paraquat and  
835 mortality was recorded from day two until 90% of the caterpillars had pupated. Results are  
836 presented as percentage mortality: (A) every two days; and (B) overall as a caterpillar, for  
837 each treatment and control group. Differences between treatment and control groups in (B)  
838 were not found to be statistically significant (i.e., all fall into a single homogeneous group). In  
839 both graphs, error bars indicate standard deviation and colours represent control or treated  
840 samples according to the provided key. Note the different y-axis scales across the two panels.



841 (A)  
842

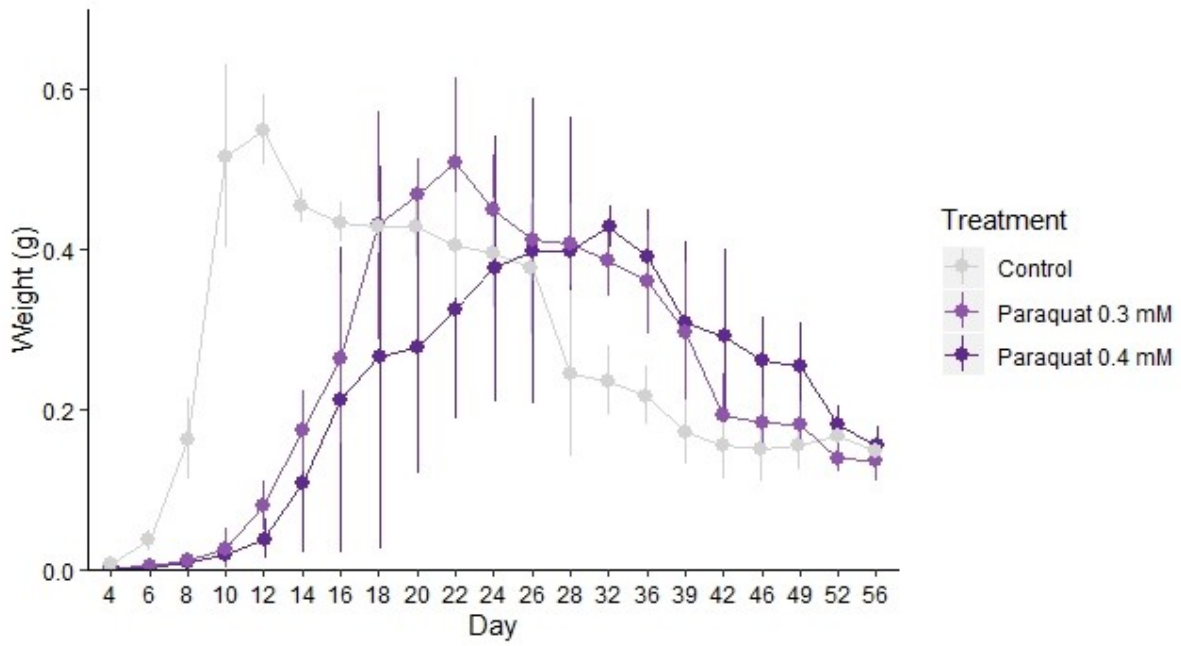

843  
844  
845 (B)  
846

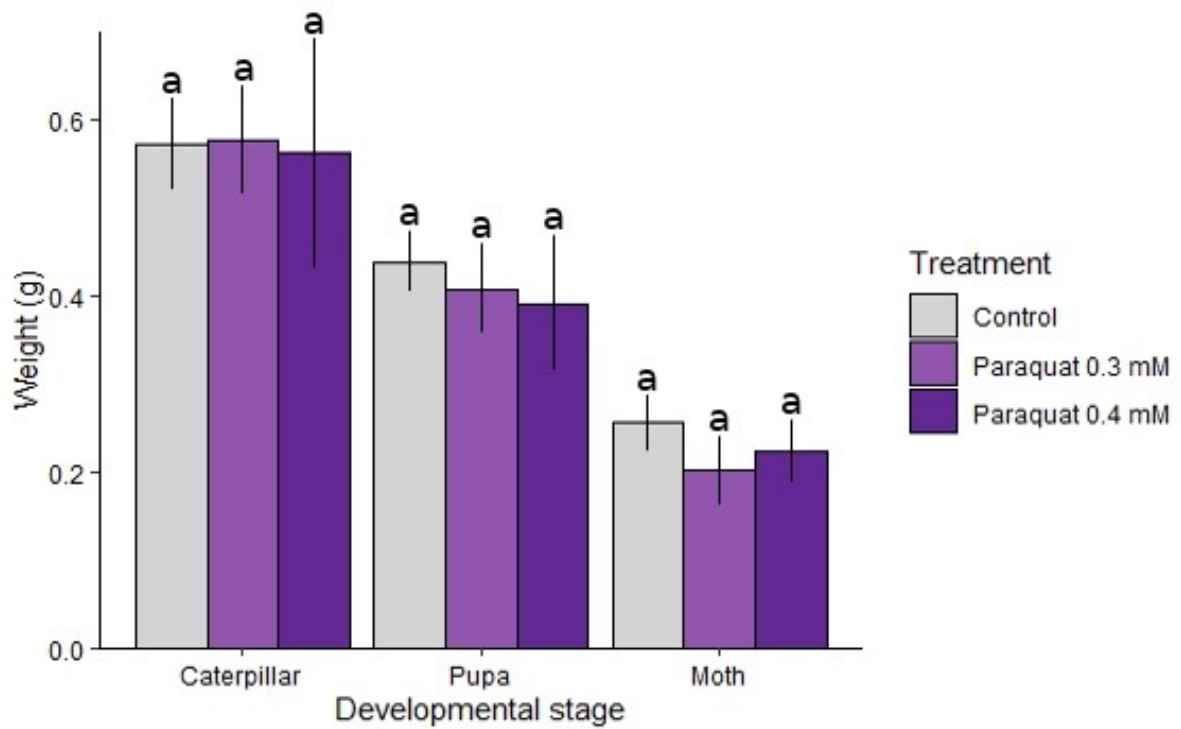

847  
848  
849

Figure 1

850 (A)  
851

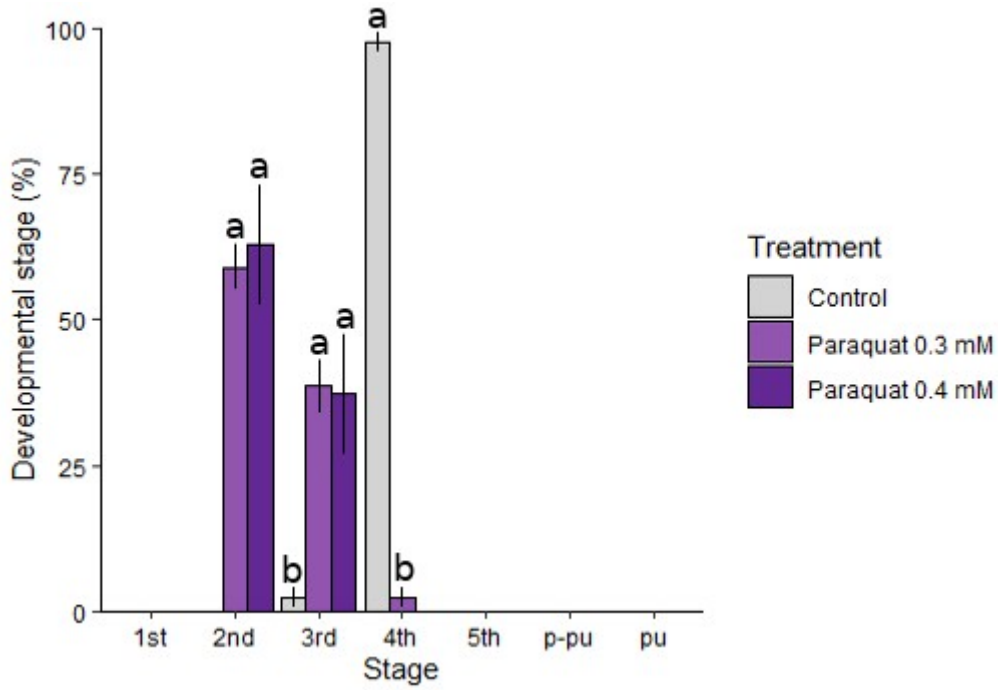

852  
853  
854 (B)  
855

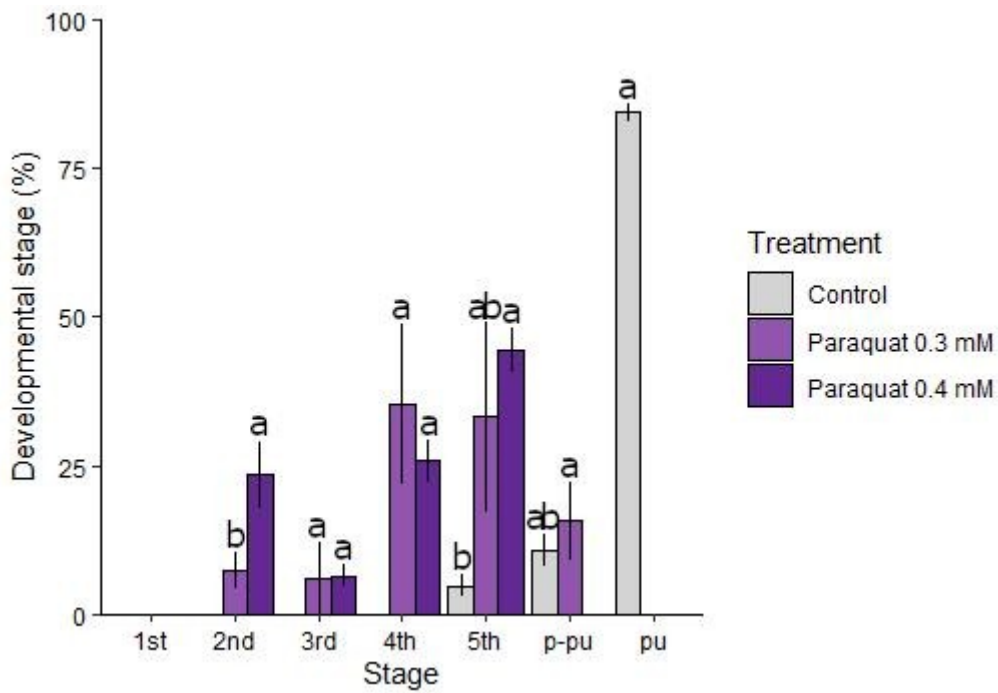

856  
857

858 (C)  
859

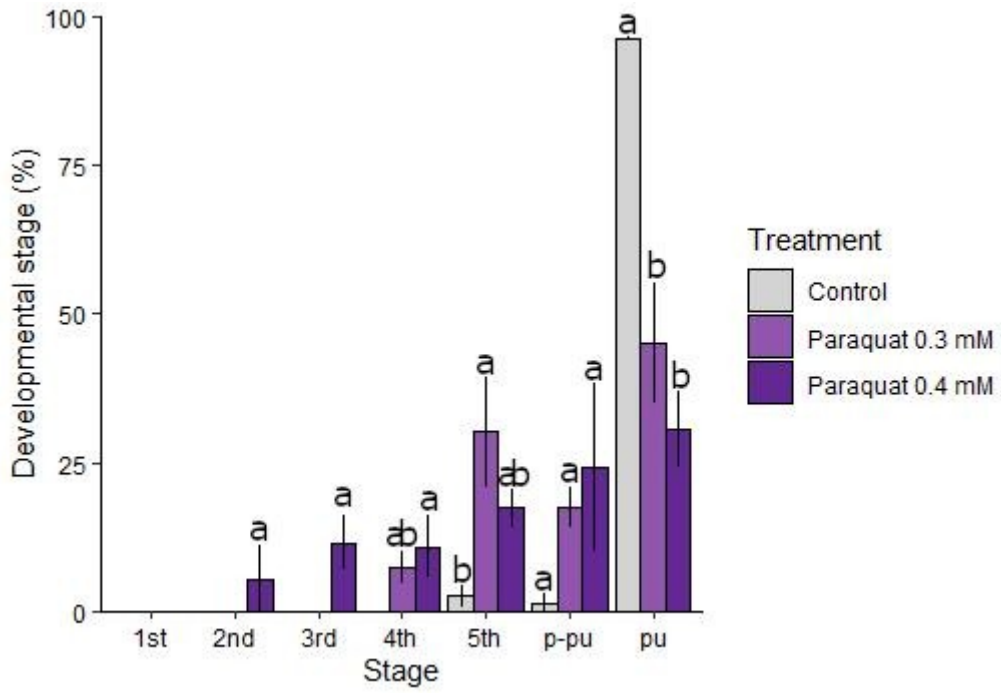

860  
861  
862

Figure 2

863 (A)  
864

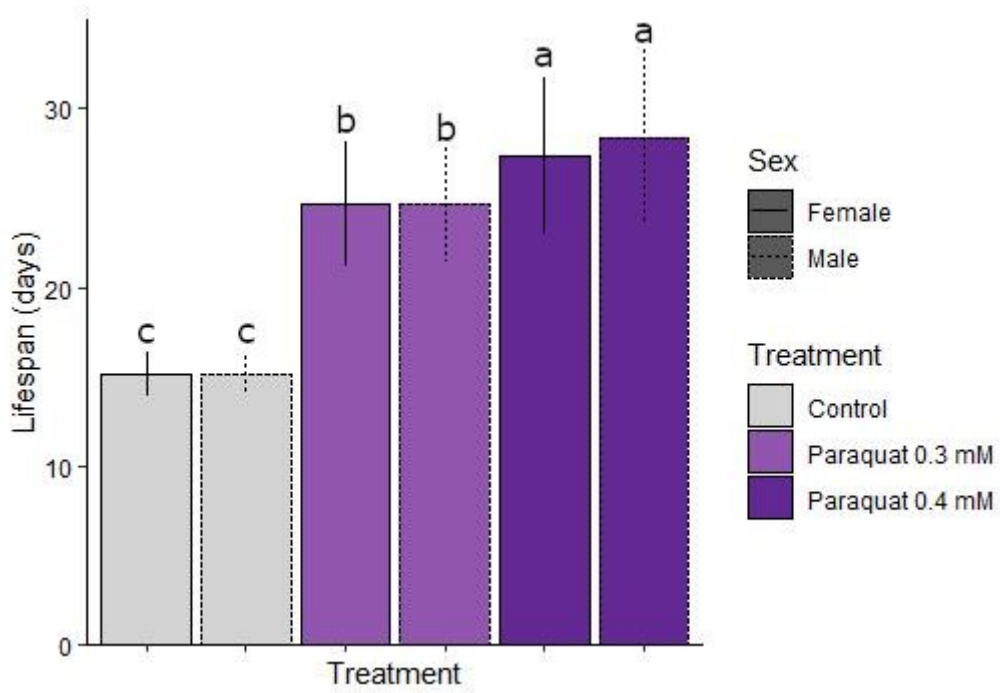

865  
866  
867 (B)  
868

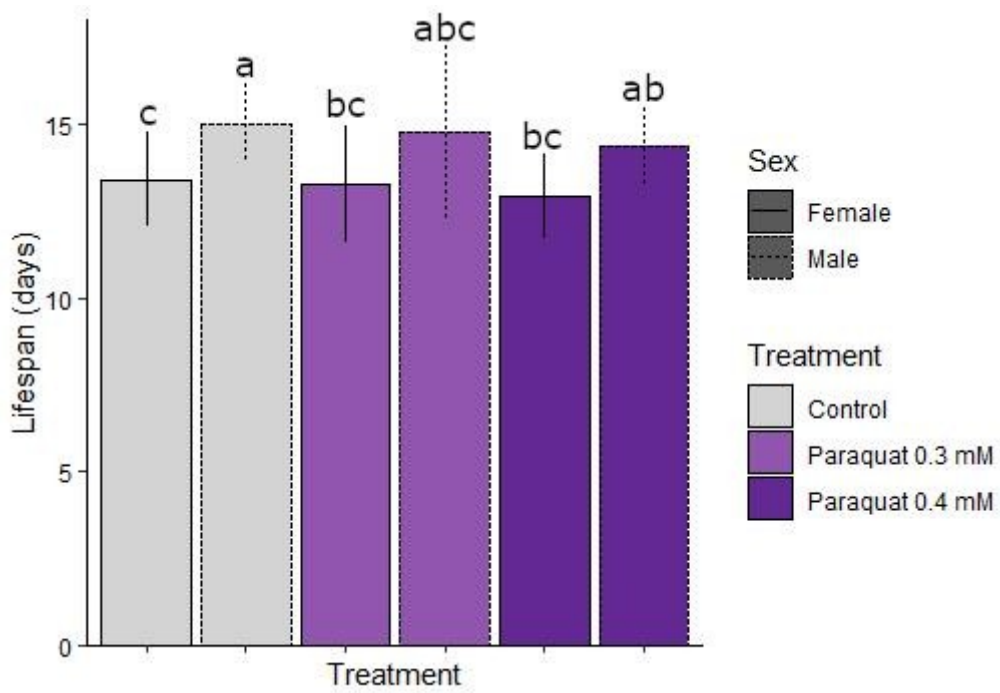

869  
870

871 (C)  
872

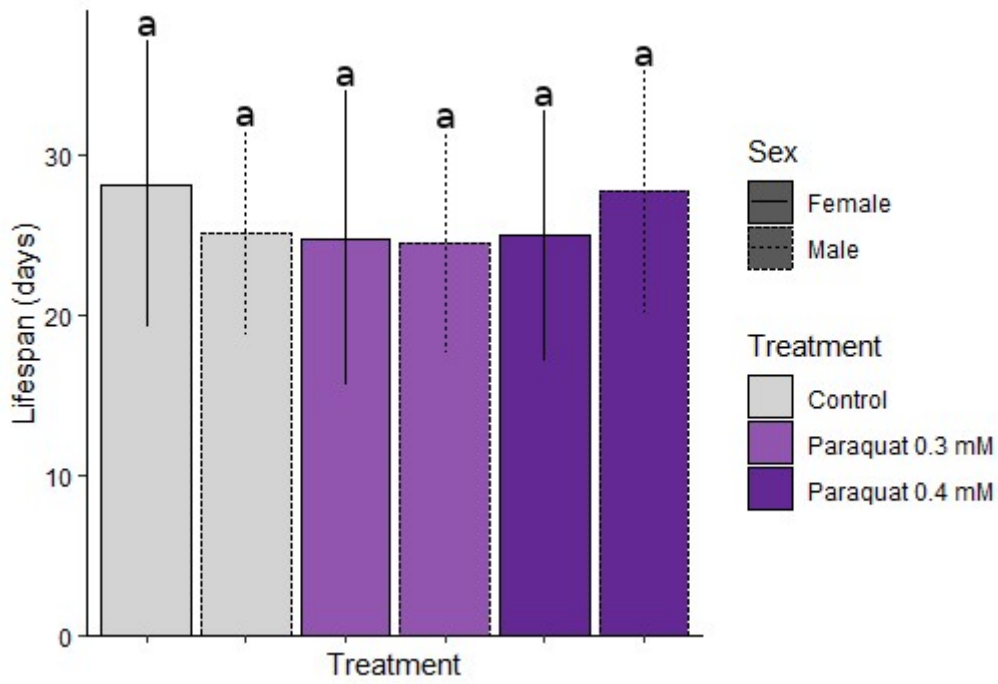

873  
874  
875 (D)  
876

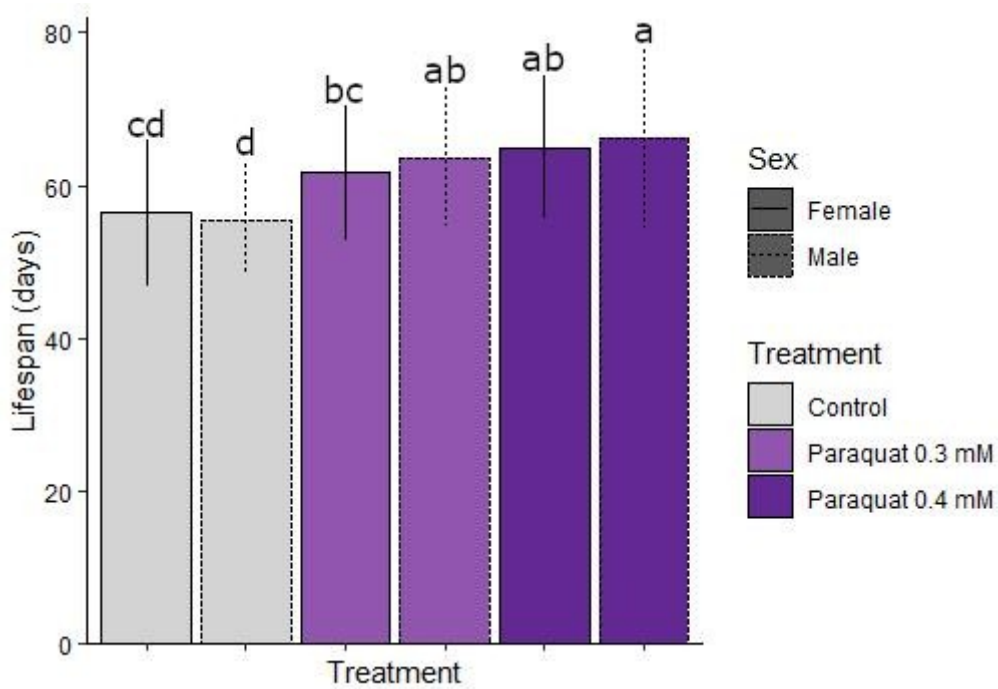

877  
878  
879

Figure 3

880 (A)  
881

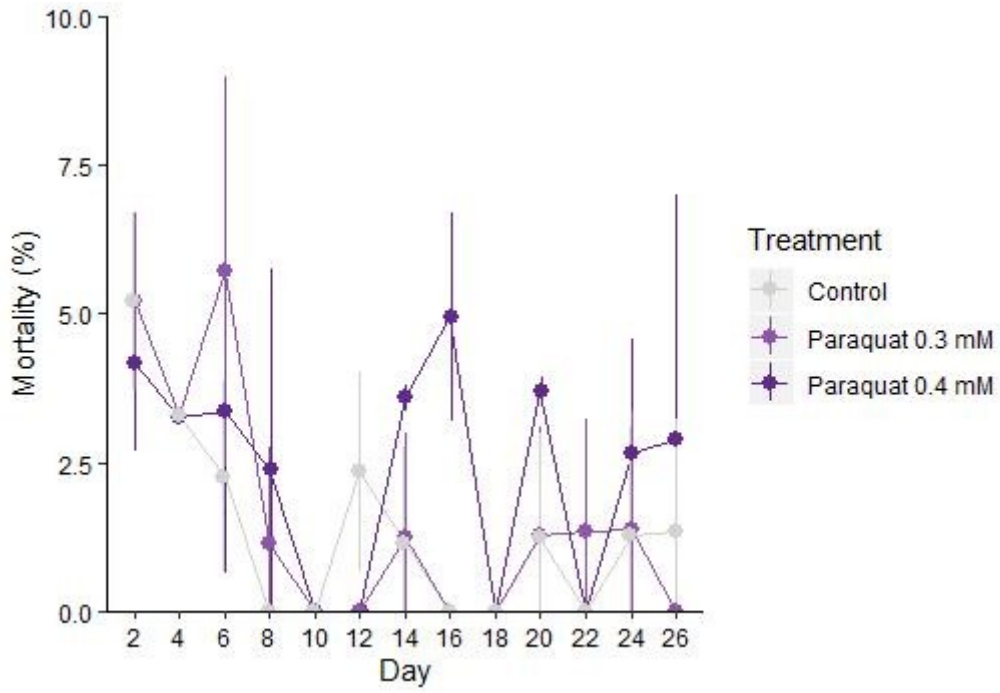

882  
883  
884 (B)  
885

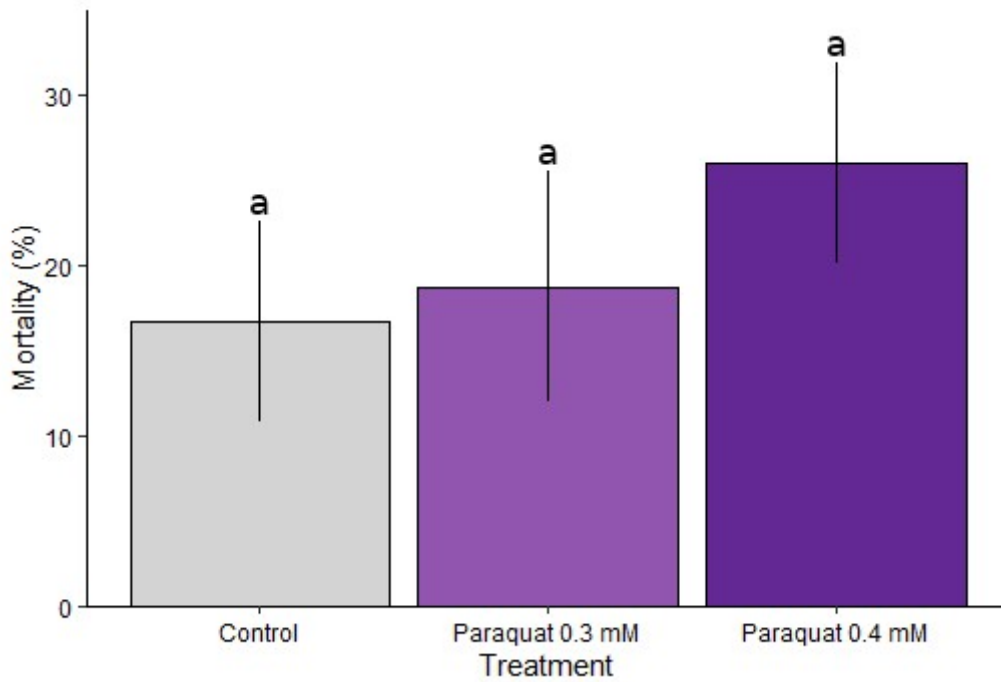

886  
887  
888

Figure 4
